# Supplementary material for: Progeria and Aging - Omics Based Comparative Analysis
Source: Preprints.org preprint supplement (doi:10.20944/preprints202207.0038.v1), 2022-07-04
Supplement: Supplementary file 1 [file SupplementaryTables.xlsx]

## Sheet: SupplementaryTable01
	Supplementary Table S1. Sample Information.
	Group	Sample ID	Sample Name	Age	Sex
	HGPS	GSM3124699	HGPS_6_1	6yr11mos	female
		GSM3124693	HGPS_8_1	8yr	female
		GSM3124694	HGPS_8_2	8yr	male
		GSM3124701	HGPS_8_3	8yr10mos	male
		GSM3124698	HGPS_8_4	8yr6mos	male
	90s	GSM3124673	90s_90_1	90	male
		GSM3124621	90s_90_2	90	male
		GSM3124622	90s_91	91	male
		GSM3124623	90s_92_1	92	female
		GSM3124676	90s_92_2	92	male
		GSM3124670	90s_94	94	male
		GSM3124624	90s_96	96	male
	Healthy Kid	GSM3124630	Healthy_Kid_6_1	6	male
		GSM3124631	Healthy_Kid_7_2	7	male
		GSM3124632	Healthy_Kid_7_1	7	male
		GSM3124633	Healthy_Kid_8_2	8	male
		GSM3124634	Healthy_Kid_8_1	8	male
		GSM3124635	Healthy_Kid_9_1	9	female

## Sheet: SupplementaryTable02
	Supplementary Table S2. Table S2: Overview Up- and Downregulated DEGs.
		Upregulated DEGs	Downregulated DEGs	Total DEGs
	HGPS vs Kids	332	165	497
	90s vs Kids	1350	1393	2743

## Sheet: SupplementaryTable03
	Supplementary Table S3. Gene Enrichment Biological Processes Analyses.
	160 elements included exclusively in "BP_90svsKids":	132 elements included exclusively in "BP_HGPSvsKids":	2 elements included exclusively in "BP_Common DEGs":
	GOBP_ORGANELLE_FISSION	GOBP_SKIN_EPIDERMIS_DEVELOPMENT	GOBP_ENERGY_HOMEOSTASIS
	GOBP_MITOTIC_NUCLEAR_DIVISION	GOBP_SKIN_DEVELOPMENT	GOBP_TONGUE_DEVELOPMENT
	GOBP_CHROMOSOME_SEGREGATION	GOBP_MOLTING_CYCLE
	GOBP_MITOTIC_SISTER_CHROMATID_SEGREGATION	GOBP_CARDIAC_EPITHELIAL_TO_MESENCHYMAL_TRANSITION	10 common elements in "BP_HGPSvsKids" and "BP_Common DEGs":
	GOBP_SISTER_CHROMATID_SEGREGATION	GOBP_EPITHELIAL_TO_MESENCHYMAL_TRANSITION	GOBP_MESENCHYME_DEVELOPMENT
	GOBP_NUCLEAR_CHROMOSOME_SEGREGATION	GOBP_RESPONSE_TO_BMP	GOBP_MESENCHYMAL_CELL_PROLIFERATION
	GOBP_REGULATION_OF_MITOTIC_CELL_CYCLE	GOBP_HEART_MORPHOGENESIS	GOBP_REGULATION_OF_HAIR_FOLLICLE_DEVELOPMENT
	GOBP_DNA_DEPENDENT_DNA_REPLICATION	GOBP_POSITIVE_REGULATION_OF_MAPK_CASCADE	GOBP_ROOF_OF_MOUTH_DEVELOPMENT
	GOBP_DNA_REPLICATION	GOBP_MUSCLE_TISSUE_DEVELOPMENT	GOBP_POSITIVE_REGULATION_OF_HAIR_FOLLICLE_DEVELOPMENT
	GOBP_POSITIVE_REGULATION_OF_CELL_CYCLE_PROCESS	GOBP_PEPTIDYL_TYROSINE_MODIFICATION	GOBP_EPIDERMIS_DEVELOPMENT
	GOBP_REGULATION_OF_NUCLEAR_DIVISION	GOBP_EYE_MORPHOGENESIS	GOBP_PHOSPHATIDYLINOSITOL_3_KINASE_SIGNALING
	GOBP_MITOTIC_CELL_CYCLE_PHASE_TRANSITION	GOBP_MESENCHYME_MORPHOGENESIS	GOBP_CYTOKINE_MEDIATED_SIGNALING_PATHWAY
	GOBP_REGULATION_OF_CELL_CYCLE_PHASE_TRANSITION	GOBP_MUSCLE_ORGAN_DEVELOPMENT	GOBP_FEMALE_SEX_DIFFERENTIATION
	GOBP_REGULATION_OF_MITOTIC_NUCLEAR_DIVISION	GOBP_REGULATION_OF_HAIR_CYCLE	GOBP_POSITIVE_REGULATION_OF_NITRIC_OXIDE_SYNTHASE_BIOSYNTHETIC_PROCESS
	GOBP_POSITIVE_REGULATION_OF_CELL_CYCLE	GOBP_REGULATION_OF_PEPTIDYL_TYROSINE_PHOSPHORYLATION
	GOBP_REGULATION_OF_MITOTIC_CELL_CYCLE_PHASE_TRANSITION	GOBP_CELL_SURFACE_RECEPTOR_SIGNALING_PATHWAY_INVOLVED_IN_HEART_DEVELOPMENT	14 common elements in "BP_HGPSvsKids" and "BP_90svsKids":
	GOBP_MICROTUBULE_CYTOSKELETON_ORGANIZATION_INVOLVED_IN_MITOSIS	GOBP_ENDOCARDIAL_CUSHION_FORMATION	GOBP_REGULATION_OF_MORPHOGENESIS_OF_AN_EPITHELIUM
	GOBP_DNA_GEOMETRIC_CHANGE	GOBP_SENSORY_ORGAN_MORPHOGENESIS	GOBP_APPENDAGE_DEVELOPMENT
	GOBP_CELL_CYCLE_G2_M_PHASE_TRANSITION	GOBP_CAMERA_TYPE_EYE_MORPHOGENESIS	GOBP_REGULATION_OF_MORPHOGENESIS_OF_A_BRANCHING_STRUCTURE
	GOBP_CHROMOSOME_SEPARATION	GOBP_EPITHELIAL_TO_MESENCHYMAL_TRANSITION_INVOLVED_IN_ENDOCARDIAL_CUSHION_FORMATION	GOBP_MAMMARY_GLAND_DEVELOPMENT
	GOBP_METAPHASE_ANAPHASE_TRANSITION_OF_CELL_CYCLE	GOBP_CAMERA_TYPE_EYE_DEVELOPMENT	GOBP_TISSUE_REMODELING
	GOBP_NEGATIVE_REGULATION_OF_CELL_CYCLE	GOBP_SENSORY_SYSTEM_DEVELOPMENT	GOBP_DEVELOPMENT_OF_PRIMARY_SEXUAL_CHARACTERISTICS
	GOBP_MEIOTIC_CELL_CYCLE_PROCESS	GOBP_BIOLOGICAL_PHASE	GOBP_SEX_DIFFERENTIATION
	GOBP_DNA_REPLICATION_INITIATION	GOBP_RESPONSE_TO_TUMOR_NECROSIS_FACTOR	GOBP_POSITIVE_REGULATION_OF_OSTEOBLAST_DIFFERENTIATION
	GOBP_REGULATION_OF_CHROMOSOME_SEPARATION	GOBP_ENDOCARDIAL_CUSHION_DEVELOPMENT	GOBP_EXTERNAL_ENCAPSULATING_STRUCTURE_ORGANIZATION
	GOBP_NEGATIVE_REGULATION_OF_CELL_CYCLE_PROCESS	GOBP_EPIDERMIS_MORPHOGENESIS	GOBP_RESPONSE_TO_TRANSFORMING_GROWTH_FACTOR_BETA
	GOBP_POSITIVE_REGULATION_OF_MITOTIC_CELL_CYCLE_PHASE_TRANSITION	GOBP_REGULATION_OF_ANIMAL_ORGAN_MORPHOGENESIS	GOBP_OSSIFICATION
	GOBP_CELL_CYCLE_CHECKPOINT_SIGNALING	GOBP_EMBRYONIC_EYE_MORPHOGENESIS	GOBP_ODONTOGENESIS
	GOBP_REGULATION_OF_CELL_CYCLE_G2_M_PHASE_TRANSITION	GOBP_NEGATIVE_REGULATION_OF_CHONDROCYTE_DIFFERENTIATION	GOBP_NEGATIVE_REGULATION_OF_REPRODUCTIVE_PROCESS
	GOBP_NEGATIVE_REGULATION_OF_CELL_CYCLE_PHASE_TRANSITION	GOBP_ACTIN_CYTOSKELETON_REORGANIZATION	GOBP_PROSTATE_GLAND_MORPHOGENESIS
	GOBP_POSITIVE_REGULATION_OF_MITOTIC_CELL_CYCLE	GOBP_BONE_REMODELING
	GOBP_SPINDLE_ORGANIZATION	GOBP_VASCULAR_PROCESS_IN_CIRCULATORY_SYSTEM	15 common elements in "BP_HGPSvsKids", "BP_90svsKids" and "BP_Common DEGs":
	GOBP_MEIOTIC_CELL_CYCLE	GOBP_POSITIVE_REGULATION_OF_PROTEIN_TYROSINE_KINASE_ACTIVITY	GOBP_MESENCHYMAL_CELL_DIFFERENTIATION
	GOBP_POSITIVE_REGULATION_OF_CELL_CYCLE_PHASE_TRANSITION	GOBP_RENAL_TUBULE_DEVELOPMENT	GOBP_INOSITOL_LIPID_MEDIATED_SIGNALING
	GOBP_MITOTIC_CELL_CYCLE_CHECKPOINT_SIGNALING	GOBP_REGULATION_OF_BODY_FLUID_LEVELS	GOBP_POSITIVE_REGULATION_OF_PHOSPHATIDYLINOSITOL_3_KINASE_SIGNALING
	GOBP_REGULATION_OF_CHROMOSOME_SEGREGATION	GOBP_KIDNEY_EPITHELIUM_DEVELOPMENT	GOBP_GLAND_DEVELOPMENT
	GOBP_DNA_UNWINDING_INVOLVED_IN_DNA_REPLICATION	GOBP_POSITIVE_REGULATION_OF_PEPTIDYL_TYROSINE_PHOSPHORYLATION	GOBP_REGULATION_OF_PHOSPHATIDYLINOSITOL_3_KINASE_SIGNALING
	GOBP_NEGATIVE_REGULATION_OF_MITOTIC_CELL_CYCLE	GOBP_ENDOCARDIAL_CUSHION_MORPHOGENESIS	GOBP_UROGENITAL_SYSTEM_DEVELOPMENT
	GOBP_KINETOCHORE_ORGANIZATION	GOBP_HAIR_FOLLICLE_MATURATION	GOBP_EPITHELIAL_CELL_PROLIFERATION
	GOBP_MITOTIC_SPINDLE_ORGANIZATION	GOBP_METANEPHRIC_RENAL_VESICLE_MORPHOGENESIS	GOBP_MORPHOGENESIS_OF_A_BRANCHING_STRUCTURE
	GOBP_ATTACHMENT_OF_SPINDLE_MICROTUBULES_TO_KINETOCHORE	GOBP_POSITIVE_REGULATION_OF_PROTEIN_KINASE_ACTIVITY	GOBP_EMBRYONIC_ORGAN_DEVELOPMENT
	GOBP_NEGATIVE_REGULATION_OF_MITOTIC_CELL_CYCLE_PHASE_TRANSITION	GOBP_NEGATIVE_REGULATION_OF_HORMONE_SECRETION	GOBP_REGULATION_OF_MESENCHYMAL_CELL_PROLIFERATION
	GOBP_REGULATION_OF_DNA_DEPENDENT_DNA_REPLICATION	GOBP_MUSCLE_ORGAN_MORPHOGENESIS	GOBP_POSITIVE_REGULATION_OF_MESENCHYMAL_CELL_PROLIFERATION
	GOBP_MICROTUBULE_ORGANIZING_CENTER_ORGANIZATION	GOBP_OUTFLOW_TRACT_MORPHOGENESIS	GOBP_REPRODUCTIVE_SYSTEM_DEVELOPMENT
	GOBP_CELL_CYCLE_DNA_REPLICATION	GOBP_CANONICAL_WNT_SIGNALING_PATHWAY	GOBP_CONNECTIVE_TISSUE_DEVELOPMENT
	GOBP_NEGATIVE_REGULATION_OF_NUCLEAR_DIVISION	GOBP_ESTABLISHMENT_OF_PLANAR_POLARITY_OF_EMBRYONIC_EPITHELIUM	GOBP_TRANSMEMBRANE_RECEPTOR_PROTEIN_SERINE_THREONINE_KINASE_SIGNALING_PATHWAY
	GOBP_METAPHASE_PLATE_CONGRESSION	GOBP_NEGATIVE_REGULATION_OF_CARTILAGE_DEVELOPMENT	GOBP_NITRIC_OXIDE_SYNTHASE_BIOSYNTHETIC_PROCESS
	GOBP_CENTROMERE_COMPLEX_ASSEMBLY	GOBP_POSITIVE_REGULATION_OF_KINASE_ACTIVITY
	GOBP_REGULATION_OF_MITOTIC_SISTER_CHROMATID_SEGREGATION	GOBP_CARDIAC_MUSCLE_TISSUE_DEVELOPMENT
	GOBP_NEGATIVE_REGULATION_OF_METAPHASE_ANAPHASE_TRANSITION_OF_CELL_CYCLE	GOBP_PULMONARY_VALVE_MORPHOGENESIS
	GOBP_ESTABLISHMENT_OF_ORGANELLE_LOCALIZATION	GOBP_POSITIVE_REGULATION_OF_CELL_ADHESION
	GOBP_DNA_RECOMBINATION	GOBP_DEVELOPMENT_OF_PRIMARY_FEMALE_SEXUAL_CHARACTERISTICS
	GOBP_REGULATION_OF_CHROMOSOME_ORGANIZATION	GOBP_VASCULAR_TRANSPORT
	GOBP_REGULATION_OF_UBIQUITIN_PROTEIN_LIGASE_ACTIVITY	GOBP_MUSCLE_CELL_DIFFERENTIATION
	GOBP_NEGATIVE_REGULATION_OF_CHROMOSOME_ORGANIZATION	GOBP_CELLULAR_RESPONSE_TO_INTERLEUKIN_1
	GOBP_NEGATIVE_REGULATION_OF_ORGANELLE_ORGANIZATION	GOBP_EPITHELIAL_TUBE_MORPHOGENESIS
	GOBP_CHROMOSOME_LOCALIZATION	GOBP_CELL_CELL_SIGNALING_BY_WNT
	GOBP_REGULATION_OF_DNA_REPLICATION	GOBP_METANEPHROS_DEVELOPMENT
	GOBP_CYTOKINESIS	GOBP_REGULATION_OF_PROTEIN_TYROSINE_KINASE_ACTIVITY
	GOBP_REGULATION_OF_MEIOTIC_CELL_CYCLE	GOBP_REGULATION_OF_CARTILAGE_DEVELOPMENT
	GOBP_POSITIVE_REGULATION_OF_CELL_CYCLE_G2_M_PHASE_TRANSITION	GOBP_PATTERN_SPECIFICATION_PROCESS
	GOBP_MITOTIC_DNA_REPLICATION	GOBP_REGULATION_OF_CHONDROCYTE_DIFFERENTIATION
	GOBP_KINETOCHORE_ASSEMBLY	GOBP_REGULATION_OF_EXTRINSIC_APOPTOTIC_SIGNALING_PATHWAY_VIA_DEATH_DOMAIN_RECEPTORS
	GOBP_DNA_CONFORMATION_CHANGE	GOBP_RENAL_VESICLE_DEVELOPMENT
	GOBP_MITOTIC_METAPHASE_PLATE_CONGRESSION	GOBP_BODY_FLUID_SECRETION
	GOBP_DNA_INTEGRITY_CHECKPOINT_SIGNALING	GOBP_GLIAL_CELL_MIGRATION
	GOBP_POSITIVE_REGULATION_OF_FIBROBLAST_PROLIFERATION	GOBP_REGULATION_OF_WNT_SIGNALING_PATHWAY
	GOBP_REGULATION_OF_CYTOKINESIS	GOBP_CELL_CELL_ADHESION_VIA_PLASMA_MEMBRANE_ADHESION_MOLECULES
	GOBP_DNA_BIOSYNTHETIC_PROCESS	GOBP_REGULATION_OF_COAGULATION
	GOBP_REGULATION_OF_UBIQUITIN_PROTEIN_TRANSFERASE_ACTIVITY	GOBP_ERK1_AND_ERK2_CASCADE
	GOBP_DOUBLE_STRAND_BREAK_REPAIR_VIA_BREAK_INDUCED_REPLICATION	GOBP_REGULATION_OF_FAT_CELL_DIFFERENTIATION
	GOBP_MEIOSIS_I_CELL_CYCLE_PROCESS	GOBP_ACTION_POTENTIAL
	GOBP_ACTIN_FILAMENT_BASED_TRANSPORT	GOBP_STRIATED_MUSCLE_CELL_DIFFERENTIATION
	GOBP_POSITIVE_REGULATION_OF_NUCLEAR_DIVISION	GOBP_HOMOPHILIC_CELL_ADHESION_VIA_PLASMA_MEMBRANE_ADHESION_MOLECULES
	GOBP_DNA_REPLICATION_CHECKPOINT_SIGNALING	GOBP_SALIVARY_GLAND_DEVELOPMENT
	GOBP_REGULATION_OF_DNA_DIRECTED_DNA_POLYMERASE_ACTIVITY	GOBP_CELL_PROLIFERATION_INVOLVED_IN_HEART_MORPHOGENESIS
	GOBP_MALE_SEX_DIFFERENTIATION	GOBP_PULMONARY_VALVE_DEVELOPMENT
	GOBP_RECOMBINATIONAL_REPAIR	GOBP_NEPHRON_DEVELOPMENT
	GOBP_REGULATION_OF_MEIOTIC_NUCLEAR_DIVISION	GOBP_HEART_VALVE_MORPHOGENESIS
	GOBP_FIBROBLAST_PROLIFERATION	GOBP_REGIONALIZATION
	GOBP_FEMALE_MEIOTIC_NUCLEAR_DIVISION	GOBP_CELL_PROLIFERATION_INVOLVED_IN_KIDNEY_DEVELOPMENT
	GOBP_NON_MEMBRANE_BOUNDED_ORGANELLE_ASSEMBLY	GOBP_GLAND_MORPHOGENESIS
	GOBP_REGULATION_OF_REPRODUCTIVE_PROCESS	GOBP_REGULATION_OF_CANONICAL_WNT_SIGNALING_PATHWAY
	GOBP_REGULATION_OF_CELL_DIVISION	GOBP_SYNAPSE_ORGANIZATION
	GOBP_NEGATIVE_REGULATION_OF_CELL_CYCLE_G2_M_PHASE_TRANSITION	GOBP_REGULATION_OF_EPITHELIAL_TO_MESENCHYMAL_TRANSITION
	GOBP_MITOTIC_CYTOKINESIS	GOBP_NOTCH_SIGNALING_INVOLVED_IN_HEART_DEVELOPMENT
	GOBP_ACTIN_FILAMENT_ORGANIZATION	GOBP_REGULATION_OF_COMPLEMENT_DEPENDENT_CYTOTOXICITY
	GOBP_MITOTIC_DNA_INTEGRITY_CHECKPOINT_SIGNALING	GOBP_METANEPHRIC_NEPHRON_DEVELOPMENT
	GOBP_DNA_STRAND_ELONGATION_INVOLVED_IN_DNA_REPLICATION	GOBP_POSITIVE_REGULATION_OF_BMP_SIGNALING_PATHWAY
	GOBP_MEIOTIC_SPINDLE_ORGANIZATION	GOBP_COCHLEA_MORPHOGENESIS
	GOBP_POSITIVE_REGULATION_OF_UBIQUITIN_PROTEIN_LIGASE_ACTIVITY	GOBP_CARDIOCYTE_DIFFERENTIATION
	GOBP_ESTABLISHMENT_OF_MITOTIC_SPINDLE_LOCALIZATION	GOBP_REGULATION_OF_BMP_SIGNALING_PATHWAY
	GOBP_AGING	GOBP_WOUND_HEALING
	GOBP_NEGATIVE_REGULATION_OF_COLD_INDUCED_THERMOGENESIS	GOBP_SECRETION_BY_TISSUE
	GOBP_REGULATION_OF_ACTIN_FILAMENT_BASED_PROCESS	GOBP_SEMI_LUNAR_VALVE_DEVELOPMENT
	GOBP_DOUBLE_STRAND_BREAK_REPAIR	GOBP_METANEPHRIC_NEPHRON_MORPHOGENESIS
	GOBP_AMEBOIDAL_TYPE_CELL_MIGRATION	GOBP_BRANCHING_INVOLVED_IN_PROSTATE_GLAND_MORPHOGENESIS
	GOBP_FOREBRAIN_DEVELOPMENT	GOBP_GLOMERULAR_MESANGIAL_CELL_PROLIFERATION
	GOBP_MEIOTIC_CHROMOSOME_SEGREGATION	GOBP_MESENCHYMAL_TO_EPITHELIAL_TRANSITION_INVOLVED_IN_METANEPHROS_MORPHOGENESIS
	GOBP_MEIOTIC_CELL_CYCLE_PHASE_TRANSITION	GOBP_THROMBIN_ACTIVATED_RECEPTOR_SIGNALING_PATHWAY
	GOBP_SPINDLE_MIDZONE_ASSEMBLY	GOBP_STEM_CELL_DIFFERENTIATION
	GOBP_MULTI_MULTICELLULAR_ORGANISM_PROCESS	GOBP_POSITIVE_REGULATION_OF_CANONICAL_WNT_SIGNALING_PATHWAY
	GOBP_POSITIVE_REGULATION_OF_UBIQUITIN_PROTEIN_TRANSFERASE_ACTIVITY	GOBP_NEUROMUSCULAR_JUNCTION_DEVELOPMENT
	GOBP_POSITIVE_REGULATION_OF_MITOTIC_NUCLEAR_DIVISION	GOBP_CELL_DIFFERENTIATION_INVOLVED_IN_EMBRYONIC_PLACENTA_DEVELOPMENT
	GOBP_FEMALE_GAMETE_GENERATION	GOBP_EMBRYONIC_CAMERA_TYPE_EYE_MORPHOGENESIS
	GOBP_EXTRACELLULAR_MATRIX_DISASSEMBLY	GOBP_SECONDARY_PALATE_DEVELOPMENT
	GOBP_POSITIVE_REGULATION_OF_ORGANELLE_ORGANIZATION	GOBP_EAR_DEVELOPMENT
	GOBP_ANATOMICAL_STRUCTURE_HOMEOSTASIS	GOBP_CELL_ADHESION_MEDIATED_BY_INTEGRIN
	GOBP_CYTOSKELETON_DEPENDENT_CYTOKINESIS	GOBP_LUNG_ALVEOLUS_DEVELOPMENT
	GOBP_FEMALE_MEIOSIS_I	GOBP_NEPHRON_EPITHELIUM_DEVELOPMENT
	GOBP_REGULATION_OF_ATTACHMENT_OF_SPINDLE_MICROTUBULES_TO_KINETOCHORE	GOBP_EXTRINSIC_APOPTOTIC_SIGNALING_PATHWAY
	GOBP_PROTEIN_LOCALIZATION_TO_CHROMOSOME	GOBP_HEART_VALVE_DEVELOPMENT
	GOBP_REGULATION_OF_CYCLIN_DEPENDENT_PROTEIN_KINASE_ACTIVITY	GOBP_SKELETAL_MUSCLE_CELL_DIFFERENTIATION
	GOBP_POSITIVE_REGULATION_OF_CELL_CYCLE_G1_S_PHASE_TRANSITION	GOBP_AXIS_ELONGATION
	GOBP_ZINC_ION_HOMEOSTASIS	GOBP_CARDIAC_NEURAL_CREST_CELL_DEVELOPMENT_INVOLVED_IN_OUTFLOW_TRACT_MORPHOGENESIS
	GOBP_MITOTIC_G2_DNA_DAMAGE_CHECKPOINT_SIGNALING	GOBP_ESTABLISHMENT_OF_PLANAR_POLARITY_INVOLVED_IN_NEURAL_TUBE_CLOSURE
	GOBP_SIGNAL_TRANSDUCTION_IN_RESPONSE_TO_DNA_DAMAGE	GOBP_GLYCINE_TRANSPORT
	GOBP_EMBRYONIC_APPENDAGE_MORPHOGENESIS	GOBP_POSITIVE_REGULATION_OF_ERK1_AND_ERK2_CASCADE
	GOBP_PROTEIN_DEPOLYMERIZATION	GOBP_SKELETAL_MUSCLE_ORGAN_DEVELOPMENT
	GOBP_MAMMARY_GLAND_EPITHELIUM_DEVELOPMENT	GOBP_MUSCLE_CONTRACTION
	GOBP_CENTROSOME_DUPLICATION	GOBP_NEGATIVE_REGULATION_OF_SECRETION
	GOBP_MITOTIC_G2_M_TRANSITION_CHECKPOINT	GOBP_RESPONSE_TO_INTERLEUKIN_1
	GOBP_EMBRYONIC_SKELETAL_SYSTEM_DEVELOPMENT	GOBP_TRABECULA_MORPHOGENESIS
	GOBP_PROTEIN_LOCALIZATION_TO_CONDENSED_CHROMOSOME	GOBP_ENDOTHELIAL_CELL_APOPTOTIC_PROCESS
	GOBP_STRESS_RESPONSE_TO_METAL_ION	GOBP_REGULATION_OF_ANATOMICAL_STRUCTURE_SIZE
	GOBP_SPINDLE_LOCALIZATION	GOBP_DIGESTIVE_SYSTEM_DEVELOPMENT
	GOBP_NEGATIVE_REGULATION_OF_CELL_CELL_ADHESION_MEDIATED_BY_CADHERIN	GOBP_COMPLEMENT_DEPENDENT_CYTOTOXICITY
	GOBP_POSITIVE_REGULATION_OF_MEMBRANE_DEPOLARIZATION	GOBP_NEUROTRANSMITTER_GATED_ION_CHANNEL_CLUSTERING
	GOBP_SPINDLE_ELONGATION	GOBP_POSITIVE_REGULATION_OF_EXTRINSIC_APOPTOTIC_SIGNALING_PATHWAY_VIA_DEATH_DOMAIN_RECEPTORS
	GOBP_DNA_DEPENDENT_DNA_REPLICATION_MAINTENANCE_OF_FIDELITY	GOBP_REGULATION_OF_SECONDARY_METABOLIC_PROCESS
	GOBP_PROSTATE_GLAND_DEVELOPMENT	GOBP_PHARYNGEAL_SYSTEM_DEVELOPMENT
	GOBP_TEMPERATURE_HOMEOSTASIS	GOBP_REGULATION_OF_OSSIFICATION
	GOBP_PROTEIN_LOCALIZATION_TO_CHROMOSOME_CENTROMERIC_REGION
	GOBP_REGULATION_OF_PROTEIN_SERINE_THREONINE_KINASE_ACTIVITY
	GOBP_NEGATIVE_REGULATION_OF_GROWTH
	GOBP_REGULATION_OF_PROTEIN_MODIFICATION_BY_SMALL_PROTEIN_CONJUGATION_OR_REMOVAL
	GOBP_ATTACHMENT_OF_MITOTIC_SPINDLE_MICROTUBULES_TO_KINETOCHORE
	GOBP_DETOXIFICATION_OF_COPPER_ION
	GOBP_FORMATION_OF_EXTRACHROMOSOMAL_CIRCULAR_DNA
	GOBP_NEGATIVE_REGULATION_OF_DNA_DEPENDENT_DNA_REPLICATION
	GOBP_REGULATION_OF_GTP_BINDING
	GOBP_RESPONSE_TO_UV
	GOBP_CELLULAR_RESPONSE_TO_RADIATION
	GOBP_KIDNEY_MORPHOGENESIS
	GOBP_ANIMAL_ORGAN_REGENERATION
	GOBP_REGULATION_OF_WOUND_HEALING
	GOBP_OSTEOBLAST_DIFFERENTIATION
	GOBP_EMBRYONIC_CAMERA_TYPE_EYE_FORMATION
	GOBP_TELOMERIC_LOOP_DISASSEMBLY
	GOBP_TRANSFORMING_GROWTH_FACTOR_BETA_ACTIVATION
	GOBP_BLASTOCYST_GROWTH
	GOBP_MITOCHONDRIAL_DEPOLARIZATION
	GOBP_REGULATION_OF_CELL_CELL_ADHESION_MEDIATED_BY_CADHERIN
	GOBP_CELLULAR_COMPONENT_DISASSEMBLY
	GOBP_APPENDAGE_MORPHOGENESIS
	GOBP_RESPONSE_TO_CADMIUM_ION
	GOBP_DEOXYRIBONUCLEOTIDE_BIOSYNTHETIC_PROCESS
	GOBP_REGULATION_OF_EXTRACELLULAR_MATRIX_DISASSEMBLY
	GOBP_REGULATION_OF_TRANSMEMBRANE_RECEPTOR_PROTEIN_SERINE_THREONINE_KINASE_SIGNALING_PATHWAY
	GOBP_POSITIVE_REGULATION_OF_EXTRACELLULAR_MATRIX_ORGANIZATION

## Sheet: SupplementaryTable04
	Supplementary Figure S4. Predicted miRNAs.
	predicted miRNAs 90s vs children	predicted miRNAs progeria vs children	predicted miRNAs common DEGs
	hsa-let-7b-5p	hsa-let-7b-5p	hsa-let-7b-5p
	hsa-mir-100	hsa-mir-100-5p	hsa-mir-100-5p
	hsa-mir-100-5p	hsa-mir-10b-5p	hsa-mir-10b-5p
	hsa-mir-10b	hsa-mir-124	hsa-mir-124-3p
	hsa-mir-10b-5p	hsa-mir-124-3p	hsa-mir-1246
	hsa-mir-124	hsa-mir-1246	hsa-mir-125b
	hsa-mir-124-3p	hsa-mir-125b	hsa-mir-125b-5p
	hsa-mir-1246	hsa-mir-125b-5p	hsa-mir-126-3p
	hsa-mir-125b	hsa-mir-126-3p	hsa-mir-126-5p
	hsa-mir-125b-5p	hsa-mir-126-5p	hsa-mir-130b-3p
	hsa-mir-126*	hsa-mir-130b-3p	hsa-mir-138-5p
	hsa-mir-126-3p	hsa-mir-138-5p	hsa-mir-145-5p
	hsa-mir-126-5p	hsa-mir-145-5p	hsa-mir-155-5p
	hsa-mir-130b-3p	hsa-mir-155	hsa-mir-17-5p
	hsa-mir-138-5p	hsa-mir-155-5p	hsa-mir-181a-5p
	hsa-mir-145	hsa-mir-17-5p	hsa-mir-181b-5p
	hsa-mir-145-5p	hsa-mir-181a-5p	hsa-mir-200a-3p
	hsa-mir-155	hsa-mir-181b-5p	hsa-mir-205-5p
	hsa-mir-155-5p	hsa-mir-200a-3p	hsa-mir-20a-5p
	hsa-mir-17	hsa-mir-205-5p	hsa-mir-218-5p
	hsa-mir-17-5p	hsa-mir-20a-5p	hsa-mir-221
	hsa-mir-181a	hsa-mir-218-5p	hsa-mir-221-3p
	hsa-mir-181a-5p	hsa-mir-221	hsa-mir-222
	hsa-mir-181b	hsa-mir-221-3p	hsa-mir-222-3p
	hsa-mir-181b-5p	hsa-mir-222	hsa-mir-22-3p
	hsa-mir-200a	hsa-mir-222-3p	hsa-mir-224-5p
	hsa-mir-200a-3p	hsa-mir-22-3p	hsa-mir-24-3p
	hsa-mir-205	hsa-mir-224-5p	hsa-mir-26a-5p
	hsa-mir-205-5p	hsa-mir-24-3p	hsa-mir-27b-3p
	hsa-mir-20a	hsa-mir-26a-5p	hsa-mir-302b-3p
	hsa-mir-20a-5p	hsa-mir-27b-3p	hsa-mir-31-5p
	hsa-mir-218	hsa-mir-302b-3p	hsa-mir-328-3p
	hsa-mir-218-5p	hsa-mir-31-5p	hsa-mir-372-3p
	hsa-mir-22	hsa-mir-328-3p	hsa-mir-675-5p
	hsa-mir-221	hsa-mir-372-3p	hsa-mir-941
	hsa-mir-221-3p	hsa-mir-675-5p	hsa-mir-99a-5p
	hsa-mir-222	hsa-mir-941	hsa-mir-99b-5p
	hsa-mir-222-3p	hsa-mir-99a-5p
	hsa-mir-22-3p	hsa-mir-99b-5p
	hsa-mir-224-5p
	hsa-mir-24
	hsa-mir-24-3p
	hsa-mir-26a
	hsa-mir-26a-5p
	hsa-mir-27b
	hsa-mir-27b-3p
	hsa-mir-302b-3p
	hsa-mir-31-5p
	hsa-mir-328-3p
	hsa-mir-372-3p
	hsa-mir-675-5p
	hsa-mir-941
	hsa-mir-99a
	hsa-mir-99a-5p
	hsa-mir-99b-5p
